# Supplementary material for: Lipoprotein(a) and Subclinical Vascular and Valvular Calcification on Cardiac Computed Tomography: The Atherosclerosis Risk in Communities Study
Source: PubMed Central journal article supplement — J Am Heart Assoc. 2022 Jun 3;11(11):e024870. doi: 10.1161/JAHA.121.024870 (PMC9238743; doi:10.1161/jaha.121.024870), 2022-06-03
Supplement: JAH3-11-e024870-s001.pdf [file JAH3-11-e024870-s001.pdf]

## **SUPPLEMENTAL MATERIAL**

Table S1: Sensitivity analyses for Adjusted Odds Ratio of CAC or ECC > 100 Comparing Elevated Lp(a) to Normal Lp(a) (adjusting for corrected LDL-C)

| CAC/ECC                  | Lp(a) ≤ 50 mg/dL | Lp(a) > 50 mg/dL        |
|--------------------------|------------------|-------------------------|
| <b>CAC</b>               |                  |                         |
| <b>Model1</b>            | reference        | 0.98 (0.78-1.23)        |
| <b>Model2</b>            | reference        | <b>1.47 (1.13-1.91)</b> |
| <b>Model3</b>            | reference        | <b>1.41 (1.09-1.84)</b> |
| <b>Aortic Valve</b>      |                  |                         |
| <b>Model1</b>            | reference        | <b>1.36 (1.04-1.79)</b> |
| <b>Model2</b>            | reference        | <b>1.83 (1.35-2.48)</b> |
| <b>Model3</b>            | reference        | <b>1.80 (1.33-2.45)</b> |
| <b>Aortic Valve Ring</b> |                  |                         |
| <b>Model1</b>            | reference        | 1.18 (0.95-1.47)        |
| <b>Model2</b>            | reference        | <b>1.47 (1.15-1.87)</b> |
| <b>Model3</b>            | reference        | <b>1.42 (1.11-1.81)</b> |
| <b>Mitral Valve</b>      |                  |                         |
| <b>Model1</b>            | reference        | 1.23 (0.96-1.57)        |
| <b>Model2</b>            | reference        | <b>1.40 (1.08-1.83)</b> |
| <b>Model3</b>            | reference        | <b>1.38 (1.06-1.80)</b> |
| <b>Thoracic Aorta</b>    |                  |                         |
| <b>Model1</b>            | reference        | 1.06 (0.83-1.34)        |
| <b>Model2</b>            | reference        | <b>1.40 (1.07-1.82)</b> |
| <b>Model3</b>            | reference        | <b>1.39 (1.06-1.81)</b> |

Model 1 is unadjusted

Model 2 is adjusted for age, race, sex, education level, smoking status, alcohol drinking status and cardiometabolic risk factors (body mass index, systolic blood pressure, diabetes, antihypertensive medication use, high density lipoprotein-C, low density lipoprotein-C (corrected) and Triglycerides)

Model 3 is Model 2 + lipid lowering therapy

CAC: Coronary artery calcium

ECC: Extra-coronary calcification

Table S2: Adjusted Difference of  $\ln(\text{CAC}+1)$  or  $\ln(\text{ECC}+1)$  with 1-unit increment in  $\log(\text{Lp(a)})$

| CAC/ECC                  | 1-unit increment in $\log(\text{Lp(a)})$ |
|--------------------------|------------------------------------------|
| <b>Thoracic Aorta</b>    |                                          |
| <b>Model 1</b>           | <b>-0.09 (-0.18--0.01)</b>               |
| <b>Model 2</b>           | 0.06 (-0.02-0.14)                        |
| <b>Model 3</b>           | 0.06 (-0.02-0.14)                        |
| <b>Aortic Valve</b>      |                                          |
| <b>Model 1</b>           | <b>0.11 (0.03-0.18)</b>                  |
| <b>Model 2</b>           | <b>0.20 (0.12-0.28)</b>                  |
| <b>Model 3</b>           | <b>0.19 (0.11-0.27)</b>                  |
| <b>Aortic Valve Ring</b> |                                          |
| <b>Model 1</b>           | 0.05 (-0.02-0.12)                        |
| <b>Model 2</b>           | <b>0.12 (0.05-0.20)</b>                  |
| <b>Model 3</b>           | <b>0.11 (0.04-0.19)</b>                  |
| <b>Mitral Valve</b>      |                                          |
| <b>Model 1</b>           | 0.06 (-0.03-0.15)                        |
| <b>Model 2</b>           | <b>0.13 (0.04-0.23)</b>                  |
| <b>Model 3</b>           | <b>0.13 (0.03-0.22)</b>                  |
| <b>CAC</b>               |                                          |
| <b>Model 1</b>           | -0.02 (-0.10-0.06)                       |
| <b>Model 2</b>           | <b>0.11 (0.04-0.18)</b>                  |
| <b>Model 3</b>           | <b>0.10 (0.03-0.18)</b>                  |

Model 1 is unadjusted

Model 2 is adjusted for age, race, sex, education level, smoking status, alcohol drinking status and cardiometabolic risk factors(body-mass index, systolic blood pressure, diabetes, antihypertensive medication use, high density lipoprotein-C and Triglycerides)

Model 3 is Model 2 + lipid lowering therapy

CAC: Coronary artery calcium

ECC: Extra-coronary calcification

Table S3: Adjusted Odds Ratio of CAC or ECC > 100 Comparing Lp(a) categories to the lowest group

| CAC/ECC                  |           | ≤ 10 mg/dL       | 10-20 mg/dL             | 20-30 mg/dL             | 30-50 mg/dL             | > 50 mg/dL |
|--------------------------|-----------|------------------|-------------------------|-------------------------|-------------------------|------------|
| <b>Thoracic Aorta</b>    |           |                  |                         |                         |                         |            |
| <b>Model 1</b>           | reference | 0.82 (0.64-1.06) | 0.81 (0.57-1.15)        | 0.66 (0.48-0.89)        | 0.94 (0.72-1.21)        |            |
| <b>Model 2</b>           | reference | 0.90 (0.68-1.20) | 1.09 (0.74-1.61)        | 1.02 (0.72-1.44)        | <b>1.35 (1.01-1.80)</b> |            |
| <b>Model 3</b>           | reference | 0.90 (0.67-1.19) | 1.09 (0.74-1.61)        | 1.02 (0.72-1.44)        | <b>1.34 (1.00-1.79)</b> |            |
| <b>Aortic Valve</b>      |           |                  |                         |                         |                         |            |
| <b>Model 1</b>           | reference | 1.24 (0.90-1.70) | 1.33 (0.87-2.02)        | 1.16 (0.78-1.71)        | <b>1.50 (1.11-2.03)</b> |            |
| <b>Model 2</b>           | reference | 1.29 (0.92-1.82) | <b>1.67 (1.06-2.62)</b> | <b>1.64 (1.08-2.49)</b> | <b>2.20 (1.57-3.10)</b> |            |
| <b>Model 3</b>           | reference | 1.29 (0.92-1.81) | <b>1.66 (1.06-2.62)</b> | <b>1.65 (1.08-2.51)</b> | <b>2.17 (1.54-3.05)</b> |            |
| <b>Aortic Valve Ring</b> |           |                  |                         |                         |                         |            |
| <b>Model 1</b>           | reference | 0.99 (0.78-1.26) | <b>1.44 (1.04-2.00)</b> | 1.06 (0.79-1.42)        | 1.23 (0.97-1.56)        |            |
| <b>Model 2</b>           | reference | 0.97 (0.75-1.26) | <b>1.53 (1.08-2.16)</b> | 1.22 (0.88-1.68)        | <b>1.46 (1.13-1.90)</b> |            |
| <b>Model 3</b>           | reference | 0.96 (0.74-1.25) | <b>1.52 (1.08-2.16)</b> | 1.22 (0.88-1.68)        | <b>1.41 (1.09-1.83)</b> |            |
| <b>Mitral Valve</b>      |           |                  |                         |                         |                         |            |
| <b>Model 1</b>           | reference | 0.99 (0.75-1.31) | 1.15 (0.80-1.67)        | 0.96 (0.68-1.36)        | 1.24 (0.95-1.61)        |            |
| <b>Model 2</b>           | reference | 0.99 (0.74-1.32) | 1.37 (0.92-2.03)        | 1.16 (0.80-1.69)        | <b>1.45 (1.09-1.92)</b> |            |
| <b>Model 3</b>           | reference | 0.98 (0.74-1.31) | 1.37 (0.92-2.03)        | 1.17 (0.80-1.69)        | <b>1.43 (1.07-1.90)</b> |            |
| <b>CAC</b>               |           |                  |                         |                         |                         |            |
| <b>Model 1</b>           | reference | 0.87 (0.68-1.12) | 1.08 (0.77-1.53)        | 0.90 (0.66-1.21)        | 0.94 (0.74-1.20)        |            |
| <b>Model 2</b>           | reference | 0.94 (0.71-1.23) | 1.25 (0.86-1.82)        | 1.24 (0.86-1.79)        | <b>1.46 (1.10-1.94)</b> |            |
| <b>Model 3</b>           | reference | 0.92 (0.70-1.22) | 1.24 (0.86-1.80)        | 1.24 (0.86-1.78)        | <b>1.40 (1.06-1.87)</b> |            |

Model 1 is unadjusted

Model 2 is adjusted for age, race, sex, education level, smoking status, alcohol drinking status and cardiometabolic risk factors (body-mass index, systolic blood pressure, diabetes, antihypertensive medication use, high density lipoprotein-C and Triglycerides)

Model 3 is Model 2 + lipid lowering therapy

CAC: Coronary artery calcium

ECC: Extra-coronary calcification

Table S4: Reviewer operating curve C-statistics testing incremental value of Lp(a) over base model

| <b>CAC/ECC</b>           | <b>ROC</b>             | <b>P value (chi-square test)</b> |
|--------------------------|------------------------|----------------------------------|
| <b>CAC</b>               |                        |                                  |
| Base model               | 0.7447 (0.7233-0.7660) | 0.757                            |
| Base model+ Lp(a)        | 0.7450 (0.7236-0.7663) |                                  |
| <b>Thoracic Aorta</b>    |                        |                                  |
| Base model               | 0.7223 (0.6988-0.7458) | 0.7482                           |
| Base model+ Lp(a)        | 0.7225 (0.6990-0.7460) |                                  |
| <b>Aortic valve ring</b> |                        |                                  |
| Base model               | 0.6903 (0.6677-0.7129) | 0.3548                           |
| Base model+ Lp(a)        | 0.6913 (0.6688-0.7139) |                                  |
| <b>Aortic valve</b>      |                        |                                  |
| Base model               | 0.7101 (0.6809-0.7392) | 0.0238                           |
| Base model+ Lp(a)        | 0.7211 (0.6920-0.7501) |                                  |
| <b>Mitral valve</b>      |                        |                                  |
| Base model               | 0.6481 (0.6222-0.6741) | 0.1432                           |
| Base model+ Lp(a)        | 0.6543 (0.6284-0.6802) |                                  |

Base model includes age, race, sex, education level, smoking and drinking status, body-mass index, systolic blood pressure, diabetes, antihypertensive medication use, high density lipoprotein-C, and triglycerides

CAC: Coronary artery calcium

Figure S1: Participant flow diagram from ARIC visit 7

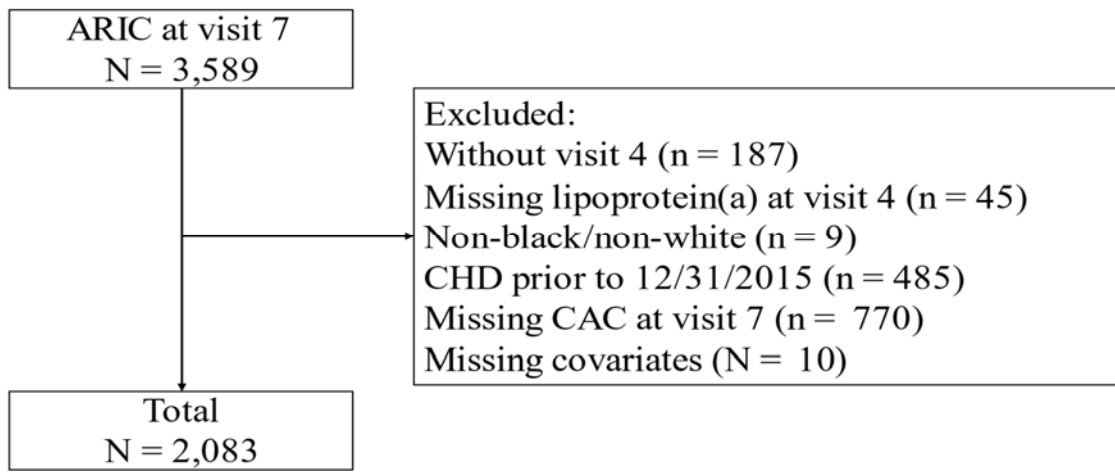

CHD: Coronary heart disease, CAC: Coronary artery calcium
